# Supplementary material for: Identification of Ferroptosis-Related Long Noncoding RNA and Construction of a Novel Prognostic Signature for Gastric Cancer
Source: Hindawi journal article supplement (doi:10.1155/2021/7724997), 2021-08-03
Supplement: f1 [file 7724997.f1.zip]

Archive with 4 entries (3 files):
- 7724997.f1/Supplementary Table 1 (1).pdf
- 7724997.f1/Supplementary Table 2 (1).pdf
- 7724997.f1/Supplementary Table 3 (1).pdf
- 7724997.f1/
