# Supplementary material for: Identification of Ferroptosis-Related Long Noncoding RNA and Construction of a Novel Prognostic Signature for Gastric Cancer
Source: Hindawi journal article supplement (doi:10.1155/2021/7724997), 2021-08-03
Supplement: f1 [file 7724997.f1.zip › 7724997.f1/Supplementary Table 1 (1).pdf]

|          |                |           |           |         |          |         |
|----------|----------------|-----------|-----------|---------|----------|---------|
| ABCC1    | BECN1          | EMC2      | HSD17B11  | MIR30B  | PRDX1    | SQSTM1  |
| ACO1     | BID            | ENPP2     | HSF1      | MIR4715 | PRDX6    | SRC     |
| ACSF2    | BLOC1S5-TXNDC5 | EPAS1     | HSPA5     | MIR6852 | PRKAA1   | SRXN1   |
| ACSL3    | BNIP3          | FADS2     | HSPB1     | MIR9-1  | PRKAA2   | STAT3   |
| ACSL4    | BRD4           | FANCD2    | IDH1      | MIR9-2  | PROM2    | STEAP3  |
| ACVR1B   | CA9            | FBXW7     | IFNG      | MIR9-3  | PSAT1    | STMN1   |
| AGPAT3   | CAPG           | Fer1HCH   | IL33      | MT1G    | PTGS2    | TAZ     |
| AIFM2    | CARS1          | FH        | IL6       | MT3     | RB1      | TF      |
| AKR1C1   | CAV1           | FLT3      | IREB2     | MTDH    | RELA     | TFAP2C  |
| AKR1C2   | CBS            | FTH1      | ISCU      | MTOR    | RGS4     | TFR2    |
| AKR1C3   | CD44           | FTL       | JDP2      | MUC1    | RIPK1    | TFRC    |
| ALB      | CDKN1A         | FTMT      | JUN       | MYB     | RPL8     | TGFBR1  |
| ALOX12   | CDKN2A         | G6PD      | KEAP1     | NCF2    | RRM2     | TLR4    |
| ALOX12B  | CDO1           | G6PDX     | KIM-1     | NCOA4   | SAT1     | TMBIM4  |
| ALOX15   | CEBPG          | GABARAPL1 | KLHL24    | NF2     | SCD      | TNFAIP3 |
| ALOX15B  | CHAC1          | GABARAPL2 | KRAS      | NFE2L2  | SCP2     | TP53    |
| ALOX5    | CHMP5          | GABPB1    | LAMP2     | NFS1    | SELENOS  | TP63    |
| ALOXE3   | CHMP6          | GCH1      | LINC00336 | NGB     | SESN2    | TRIB3   |
| ANGPTL7  | CISD1          | GCLC      | LINC00472 | NNMT    | SETD1B   | TSC22D3 |
| ANO6     | CISD2          | GDF15     | LOC284561 | NOS2    | SIRT1    | TUBE1   |
| ARNTL    | CS             | GLS2      | LOC390705 | NOX1    | SLC1A4   | TXNIP   |
| ARRDC3   | CXCL2          | GLUT13    | LONP1     | NOX3    | SLC1A5   | TXNRD1  |
| ASNS     | CYBB           | GOT1      | LPCAT3    | NOX4    | SLC2A1   | UBC     |
| ATF3     | DDIT3          | GPT2      | LPIN1     | NOX5    | SLC2A12  | ULK1    |
| ATF4     | DDIT4          | GPX2      | LURAP1L   | NQO1    | SLC2A14  | ULK2    |
| ATG13    | DNAJB6         | GPX4      | MAFG      | NRAS    | SLC2A3   | VDAC2   |
| ATG16L1  | DPP4           | HAMP      | MAP1LC3A  | OTUB1   | SLC2A6   | VEGFA   |
| ATG3     | DRD4           | HBA1      | MAP3K5    | OXSR1   | SLC2A8   | VLDLR   |
| ATG4D    | DRD5           | HELLS     | MAPK1     | PANX1   | SLC38A1  | WIPI1   |
| ATG5     | DUOX1          | HERPUD1   | MAPK14    | PCK2    | SLC3A2   | WIPI2   |
| ATG7     | DUOX2          | HIC1      | MAPK3     | PEBP1   | SLC40A1  | XBP1    |
| ATM      | DUSP1          | HIF1A     | MAPK8     | PGD     | SLC7A11  | YWHAE   |
| ATP5MC3  | EGFR           | HILPDA    | MAPK9     | PHKG2   | SLC7A5   | YY1AP1  |
| ATP6V1G2 | EGLN2          | HMGB1     | MIOX      | PIK3CA  | SNORA16A | ZEB1    |
| AURKA    | EIF2AK4        | HMOX1     | MIR137    | PLIN2   | SNX4     | ZFP36   |
| BACH1    | EIF2S1         | HNF4A     | MIR17     | PLIN4   | SOC51    | ZFP69B  |
| BAP1     | ELAVL1         | HRAS      | MIR212    | PML     | SP1      | ZNF419  |
