# Supplementary material for: Identification of Ferroptosis-Related Long Noncoding RNA and Construction of a Novel Prognostic Signature for Gastric Cancer
Source: Hindawi journal article supplement (doi:10.1155/2021/7724997), 2021-08-03
Supplement: f1 [file 7724997.f1.zip › 7724997.f1/Supplementary Table 2 (1).pdf]

| Gene       | HR        | HR.95L    | HR.95H    | Pvalue    |
|------------|-----------|-----------|-----------|-----------|
| LINC00519  | 3.0519506 | 1.5184399 | 6.1341925 | 0.0017324 |
| LINC02126  | 3.0637767 | 1.0686351 | 8.7838475 | 0.0372065 |
| AP000873.4 | 0.4601452 | 0.2370486 | 0.8932077 | 0.0218085 |
| AL136115.1 | 0.6611414 | 0.4573684 | 0.9557021 | 0.0277384 |
| AC011747.1 | 1.2949823 | 1.029637  | 1.628709  | 0.0271317 |
| AL161785.1 | 1.0485206 | 1.0218769 | 1.0758589 | 0.0003087 |
| FAM83A-AS1 | 1.1251357 | 1.0098037 | 1.25364   | 0.0326165 |
| AL121748.1 | 5.3648764 | 2.2073742 | 13.038976 | 0.0002093 |
| AC116158.1 | 2.8236974 | 1.0215997 | 7.804688  | 0.0453751 |
| AC114271.1 | 0.2278317 | 0.0671634 | 0.7728514 | 0.0176245 |
| AP003419.2 | 1.195873  | 1.0865071 | 1.3162476 | 0.0002567 |
| PGM5P4-AS1 | 1.869443  | 1.0662938 | 3.277537  | 0.0289593 |
| AC026691.1 | 2.3024683 | 1.0284701 | 5.1546081 | 0.0425362 |
| LINC02773  | 2.2729409 | 1.2221342 | 4.2272447 | 0.0094972 |
| LINC01697  | 2.7542317 | 1.3313531 | 5.6978063 | 0.0063028 |
| AC126696.3 | 1.3353913 | 1.0424398 | 1.7106694 | 0.0220853 |
| AC245041.1 | 1.0269672 | 1.0095573 | 1.0446773 | 0.0022859 |
| AC091182.2 | 1.4022588 | 1.0315739 | 1.9061452 | 0.0308949 |
| AC010331.1 | 1.4850464 | 1.0478996 | 2.1045555 | 0.0262172 |
| AC026368.1 | 1.0377108 | 1.0013448 | 1.0753975 | 0.0419716 |
| AL590226.1 | 2.0632153 | 1.0708095 | 3.9753641 | 0.0304324 |
| AL356417.2 | 2.1495437 | 1.4058981 | 3.2865383 | 0.0004115 |
| AC147067.2 | 1.3763918 | 1.0784285 | 1.7566805 | 0.0102711 |
| AC006942.1 | 1.660095  | 1.1238553 | 2.4521976 | 0.0108776 |
| RRN3P2     | 1.3705426 | 1.0342197 | 1.816236  | 0.0282221 |
| AL356215.1 | 1.1152372 | 1.0051402 | 1.2373935 | 0.0397206 |
| AP001189.3 | 1.1887131 | 1.0342833 | 1.366201  | 0.0149034 |
| FLNB-AS1   | 1.3832217 | 1.0220984 | 1.8719355 | 0.035592  |
| LINC01140  | 2.8970067 | 1.2859307 | 6.5265167 | 0.0102632 |
| AL353796.1 | 0.6687988 | 0.4605854 | 0.9711375 | 0.034527  |
| AC012409.3 | 3.1161649 | 1.2421697 | 7.8173565 | 0.0154315 |
| AC005498.3 | 3.0129684 | 1.2392782 | 7.3252144 | 0.0149638 |
| AC005586.1 | 0.7663959 | 0.6493305 | 0.9045667 | 0.0016556 |
| AC104958.1 | 0.146414  | 0.0264025 | 0.8119324 | 0.0279248 |
| SENCR      | 1.5681783 | 1.0816505 | 2.2735468 | 0.0175901 |
| AC087521.1 | 2.5844571 | 1.0947009 | 6.1015924 | 0.0302803 |
| AC007277.1 | 0.5072494 | 0.2630449 | 0.9781675 | 0.0427803 |
| AP001363.2 | 1.5512406 | 1.0020599 | 2.4014008 | 0.0489309 |
| LINC02544  | 1.1106376 | 1.0293482 | 1.1983465 | 0.006813  |
| MAGI2-AS3  | 1.2074864 | 1.0230544 | 1.425167  | 0.0257816 |
| AL590705.3 | 2.0354852 | 1.2202239 | 3.3954425 | 0.0064824 |
| LINC01711  | 1.0839034 | 1.033518  | 1.1367451 | 0.0009084 |
| AL139393.3 | 1.1225483 | 1.0259626 | 1.2282268 | 0.0117912 |
| CFAP61-AS1 | 1.1012363 | 1.0192021 | 1.1898734 | 0.0146257 |
| AC068790.7 | 1.6279972 | 1.0975723 | 2.414761  | 0.0154013 |
| AC090772.1 | 2.0885386 | 1.165443  | 3.742777  | 0.0133479 |
| AC007541.1 | 1.9413851 | 1.0742619 | 3.508433  | 0.0280048 |
| MSC-AS1    | 1.4201076 | 1.0661138 | 1.8916418 | 0.0165027 |
| AL049838.1 | 1.3904867 | 1.0331166 | 1.8714762 | 0.0296366 |
| AC032044.1 | 0.6935633 | 0.4830731 | 0.9957709 | 0.0473752 |
| AC129507.1 | 3.7903645 | 1.805432  | 7.9575762 | 0.0004295 |
| AC010768.2 | 0.6604309 | 0.4490628 | 0.9712873 | 0.0350315 |
| WDFY3-AS2  | 2.9060403 | 1.0154031 | 8.3169632 | 0.0467613 |

|             |           |           |           |           |
|-------------|-----------|-----------|-----------|-----------|
| SREBF2-AS1  | 0.7572195 | 0.5889239 | 0.9736086 | 0.0301194 |
| LNCOG       | 2.0258711 | 1.0348298 | 3.9660181 | 0.0394124 |
| AC061975.6  | 1.2556812 | 1.0318887 | 1.5280092 | 0.0230017 |
| CYP1B1-AS1  | 3.4954336 | 1.115679  | 10.951229 | 0.0317271 |
| AP001528.1  | 1.4242892 | 1.1066728 | 1.8330619 | 0.0060087 |
| TYMSOS      | 0.903071  | 0.8187702 | 0.9960515 | 0.041441  |
| AC022509.2  | 1.1520592 | 1.0023465 | 1.3241334 | 0.0462655 |
| LINC01094   | 1.6439661 | 1.267913  | 2.1315535 | 0.000176  |
| PVT1        | 0.897963  | 0.8186155 | 0.9850014 | 0.0226003 |
| AL139147.1  | 3.762939  | 1.4984605 | 9.4495054 | 0.0047894 |
| AC007405.3  | 0.377603  | 0.1562647 | 0.9124516 | 0.0305032 |
| NR2F1-AS1   | 1.3371542 | 1.0106596 | 1.7691233 | 0.0419313 |
| AC083902.1  | 1.8809807 | 1.0229537 | 3.4586984 | 0.0420536 |
| UBE2R2-AS1  | 0.752493  | 0.5818404 | 0.9731975 | 0.0302348 |
| AC093278.2  | 1.2326001 | 1.0156174 | 1.4959403 | 0.0342747 |
| LINC00449   | 0.4142321 | 0.2032459 | 0.8442397 | 0.0152641 |
| LINC00460   | 1.0694705 | 1.0050494 | 1.1380208 | 0.0341024 |
| LINC02657   | 1.091342  | 1.0425023 | 1.1424699 | 0.0001827 |
| AC005165.1  | 1.1817219 | 1.0455318 | 1.3356521 | 0.007525  |
| AC002401.4  | 1.4689713 | 1.1299515 | 1.9097073 | 0.0040714 |
| AC048382.2  | 2.2447177 | 1.2383006 | 4.0690909 | 0.0077166 |
| AC106782.5  | 1.2874148 | 1.0056365 | 1.6481471 | 0.0450099 |
| AL390955.2  | 2.1118788 | 1.0082059 | 4.4237314 | 0.047521  |
| LINC00592   | 1.4767117 | 1.2000766 | 1.8171153 | 0.0002303 |
| ADAMTS9-AS1 | 2.6580774 | 1.2271756 | 5.757428  | 0.0131714 |
| LAMC1-AS1   | 1.4754516 | 1.0527503 | 2.0678764 | 0.0239181 |
| AP003419.3  | 1.1870854 | 1.0852541 | 1.2984716 | 0.0001783 |
| AC110995.1  | 2.0523118 | 1.3538633 | 3.1110849 | 0.0007057 |
| STX18-AS1   | 0.3120798 | 0.1069916 | 0.9102938 | 0.0330032 |
| LINC01705   | 1.0949043 | 1.0110068 | 1.185764  | 0.0258077 |
| AL355574.1  | 0.8097964 | 0.6983225 | 0.9390649 | 0.0052385 |
| CYMP-AS1    | 2.4108906 | 1.6804132 | 3.4589074 | 1.77E-06  |
| AC037198.1  | 1.2372546 | 1.0591632 | 1.445291  | 0.0072565 |
| AC006547.1  | 0.7457059 | 0.5828149 | 0.9541233 | 0.0196257 |
| SCAT1       | 1.2681942 | 1.0534071 | 1.5267758 | 0.0120898 |
| LINC02829   | 2.1893127 | 1.0802653 | 4.4369565 | 0.0296912 |
| LINC01614   | 1.1163654 | 1.0455456 | 1.1919821 | 0.0009951 |
| AC023511.1  | 1.1632929 | 1.0102539 | 1.3395152 | 0.035578  |
| LINC02696   | 6.4123527 | 2.436603  | 16.875242 | 0.0001673 |
| AL121821.2  | 2.9659299 | 1.2030584 | 7.3119809 | 0.0182002 |
| POLH-AS1    | 0.7841775 | 0.6279941 | 0.979204  | 0.0319198 |
| AC002451.1  | 1.4936608 | 1.0742788 | 2.0767633 | 0.0170303 |
