# Supplementary material for: Identification of Ferroptosis-Related Long Noncoding RNA and Construction of a Novel Prognostic Signature for Gastric Cancer
Source: Hindawi journal article supplement (doi:10.1155/2021/7724997), 2021-08-03
Supplement: f1 [file 7724997.f1.zip › 7724997.f1/Supplementary Table 3 (1).pdf]

| Gene sets enriched in phenotype high risk score group (185 samples) |      |       |       |           |           |            |             |                                |
|---------------------------------------------------------------------|------|-------|-------|-----------|-----------|------------|-------------|--------------------------------|
| NAME                                                                | SIZE | ES    | NES   | NOM p-val | FDR q-val | FWER p-val | RANK AT MAX | LEADING EDGE                   |
| KEGG_HYPERTROPHIC_CARDIOMYOPATHY_HCM                                | 83   | 0.74  | 2.48  | 0         | 0         | 0          | 4552        | tags=47%, list=8%, signal=51%  |
| KEGG_DILATED_CARDIOMYOPATHY                                         | 90   | 0.73  | 2.45  | 0         | 0         | 0          | 4548        | tags=48%, list=8%, signal=52%  |
| KEGG_FOCAL_ADHESION                                                 | 199  | 0.71  | 2.37  | 0         | 0         | 0          | 5015        | tags=47%, list=9%, signal=51%  |
| KEGG_ECM_RECEPTOR_INTERACTION                                       | 84   | 0.81  | 2.37  | 0         | 0         | 0          | 4975        | tags=60%, list=9%, signal=65%  |
| KEGG_CALCIIUM_SIGNALING_PATHWAY                                     | 177  | 0.63  | 2.36  | 0         | 0         | 0          | 7114        | tags=46%, list=13%, signal=53% |
| KEGG_CYTOKINE_CYTOKINE_RECEPTOR_INTERACTION                         | 264  | 0.64  | 2.31  | 0         | 0         | 0          | 7060        | tags=48%, list=12%, signal=55% |
| KEGG_HEMATOPOIETIC_CELL_LINEAGE                                     | 85   | 0.76  | 2.27  | 0         | 0         | 0.001      | 7247        | tags=58%, list=13%, signal=66% |
| KEGG_NEUROACTIVE_LIGAND_RECEPTOR_INTERACTION                        | 271  | 0.57  | 2.25  | 0         | 0         | 0.001      | 5667        | tags=35%, list=10%, signal=38% |
| KEGG_REGULATION_OF_ACTIN_CYTOSKELETON                               | 213  | 0.58  | 2.23  | 0         | 0         | 0.003      | 6383        | tags=41%, list=11%, signal=46% |
| KEGG_CELL_ADHESION_MOLECULES_CAMS                                   | 131  | 0.72  | 2.2   | 0         | 0         | 0.003      | 5736        | tags=51%, list=10%, signal=57% |
| KEGG_ARRHYTHMOGENIC_RIGHT_VENTRICULAR_CARDIOMYOPATHY_ARVC           | 74   | 0.67  | 2.2   | 0         | 0         | 0.003      | 4548        | tags=43%, list=8%, signal=47%  |
| KEGG_COMPLEMENT_AND_COAGULATION_CASCADES                            | 69   | 0.74  | 2.18  | 0         | 0         | 0.003      | 7958        | tags=64%, list=14%, signal=74% |
| KEGG_VASCULAR_SMOOTH_MUSCLE_CONTRACTION                             | 114  | 0.64  | 2.17  | 0         | 0         | 0.003      | 7183        | tags=50%, list=13%, signal=57% |
| KEGG_JAK_STAT_SIGNALING_PATHWAY                                     | 155  | 0.58  | 2.11  | 0         | 0.001     | 0.017      | 9340        | tags=45%, list=17%, signal=53% |
| KEGG_MAPK_SIGNALING_PATHWAY                                         | 267  | 0.54  | 2.06  | 0         | 0.004     | 0.038      | 6892        | tags=38%, list=12%, signal=43% |
| KEGG_CHEMOKINE_SIGNALING_PATHWAY                                    | 188  | 0.61  | 2.05  | 0         | 0.004     | 0.04       | 8272        | tags=55%, list=15%, signal=64% |
| KEGG_LEUKOCYTE_TRANSENDOTHELIAL_MIGRATION                           | 116  | 0.61  | 2.05  | 0.002     | 0.004     | 0.04       | 6296        | tags=43%, list=11%, signal=48% |
| KEGG_GAP_JUNCTION                                                   | 90   | 0.57  | 2.04  | 0         | 0.004     | 0.041      | 3746        | tags=32%, list=7%, signal=34%  |
| KEGG_GLYCOSPHINGOLIPID_BIOSYNTHESIS_GANGLIO_SERIES                  | 15   | 0.77  | 1.99  | 0.004     | 0.007     | 0.079      | 6200        | tags=73%, list=11%, signal=82% |
| KEGG_MELANOGENESIS                                                  | 101  | 0.55  | 1.98  | 0         | 0.007     | 0.086      | 7049        | tags=40%, list=12%, signal=45% |
| KEGG_GLYCOSAMINOGLYCAN_DEGRADATION                                  | 21   | 0.7   | 1.97  | 0         | 0.009     | 0.097      | 6046        | tags=57%, list=11%, signal=64% |
| KEGG_AXON_GUIDANCE                                                  | 129  | 0.55  | 1.97  | 0         | 0.009     | 0.099      | 4184        | tags=34%, list=7%, signal=37%  |
| KEGG_RENAL_CELL_CARCIOMA                                            | 70   | 0.6   | 1.96  | 0.002     | 0.008     | 0.102      | 5378        | tags=43%, list=10%, signal=47% |
| KEGG_TOLL LIKE RECEPTOR SIGNALING PATHWAY                           | 102  | 0.58  | 1.96  | 0.002     | 0.008     | 0.104      | 6827        | tags=42%, list=12%, signal=48% |
| KEGG_PATHWAYS_IN_CANCER                                             | 325  | 0.51  | 1.94  | 0         | 0.01      | 0.121      | 6338        | tags=36%, list=11%, signal=40% |
| KEGG_HEDGEHOG_SIGNALING_PATHWAY                                     | 56   | 0.6   | 1.93  | 0.002     | 0.011     | 0.136      | 7599        | tags=46%, list=13%, signal=54% |
| KEGG_LONG_TERM_DEPRESSION                                           | 70   | 0.53  | 1.89  | 0         | 0.015     | 0.169      | 11402       | tags=51%, list=20%, signal=64% |
| KEGG_TGF_BETA_SIGNALING_PATHWAY                                     | 85   | 0.56  | 1.89  | 0.004     | 0.015     | 0.176      | 7251        | tags=46%, list=13%, signal=53% |
| KEGG_GLYCOSAMINOGLYCAN_BIOSYNTHESIS_CHONDROITIN_SULFATE             | 22   | 0.72  | 1.88  | 0.004     | 0.015     | 0.179      | 6203        | tags=50%, list=11%, signal=56% |
| KEGG_GLYCOSAMINOGLYCAN_BIOSYNTHESIS_HEPARAN_SULFATE                 | 26   | 0.64  | 1.87  | 0.006     | 0.018     | 0.199      | 8480        | tags=50%, list=15%, signal=59% |
| KEGG_LEISHMANIA_INFECTION                                           | 70   | 0.68  | 1.86  | 0.017     | 0.018     | 0.202      | 6320        | tags=54%, list=11%, signal=61% |
| KEGG_NEUROTROPHIN_SIGNALING_PATHWAY                                 | 126  | 0.54  | 1.86  | 0.004     | 0.018     | 0.21       | 7980        | tags=47%, list=14%, signal=54% |
| KEGG_ALDOSTERONE_REGULATED_SODIUM_REABSORPTION                      | 42   | 0.56  | 1.83  | 0.002     | 0.023     | 0.252      | 6930        | tags=45%, list=12%, signal=52% |
| KEGG_LYSOSOME                                                       | 121  | 0.59  | 1.8   | 0.02      | 0.028     | 0.295      | 8571        | tags=52%, list=15%, signal=61% |
| KEGG_VASOPRESSIN_REGULATED_WATER_REABSORPTION                       | 44   | 0.53  | 1.78  | 0.004     | 0.032     | 0.325      | 6769        | tags=41%, list=12%, signal=46% |
| KEGG_ADIPOCYTOKINE_SIGNALING_PATHWAY                                | 67   | 0.52  | 1.76  | 0.008     | 0.039     | 0.364      | 5778        | tags=33%, list=10%, signal=37% |
| KEGG_BASAL_CELL_CARCIOMA                                            | 55   | 0.57  | 1.76  | 0.004     | 0.039     | 0.365      | 7599        | tags=44%, list=13%, signal=50% |
| KEGG_VIRAL_MYOCARDITIS                                              | 68   | 0.58  | 1.75  | 0.024     | 0.038     | 0.368      | 5736        | tags=43%, list=10%, signal=47% |
| KEGG_MELANOMA                                                       | 71   | 0.49  | 1.74  | 0.01      | 0.042     | 0.393      | 5015        | tags=32%, list=9%, signal=36%  |
| KEGG_ABC_TRANSPORTERS                                               | 44   | 0.51  | 1.74  | 0.01      | 0.041     | 0.393      | 7703        | tags=34%, list=14%, signal=39% |
| KEGG_LONG_TERM_POTENTIATION                                         | 70   | 0.48  | 1.73  | 0.01      | 0.041     | 0.399      | 7049        | tags=40%, list=12%, signal=46% |
| KEGG_GNRH_SIGNALING_PATHWAY                                         | 101  | 0.47  | 1.73  | 0.012     | 0.042     | 0.408      | 8293        | tags=41%, list=15%, signal=47% |
| KEGG_DORSO_VENTRAL_AXIS_FORMATION                                   | 24   | 0.56  | 1.72  | 0.014     | 0.043     | 0.416      | 4319        | tags=38%, list=8%, signal=41%  |
| KEGG_ASTHMA                                                         | 28   | 0.69  | 1.72  | 0.031     | 0.042     | 0.417      | 11853       | tags=68%, list=21%, signal=86% |
| KEGG_NATURAL_KILLER_CELL_MEDIATED_CYTOTOXICITY                      | 132  | 0.5   | 1.71  | 0.025     | 0.045     | 0.435      | 10436       | tags=45%, list=18%, signal=56% |
| KEGG_PRION_DISEASES                                                 | 35   | 0.56  | 1.7   | 0.02      | 0.046     | 0.445      | 6769        | tags=46%, list=12%, signal=52% |
| KEGG_FC_GAMMA_R_MEDIATED_PHAGOCYTOSIS                               | 96   | 0.52  | 1.7   | 0.018     | 0.046     | 0.449      | 8272        | tags=44%, list=15%, signal=51% |
| KEGG_NOD LIKE RECEPTOR SIGNALING PATHWAY                            | 62   | 0.54  | 1.69  | 0.03      | 0.047     | 0.461      | 6321        | tags=42%, list=11%, signal=47% |
| KEGG_INSULIN_SIGNALING_PATHWAY                                      | 137  | 0.46  | 1.69  | 0.014     | 0.048     | 0.473      | 9210        | tags=41%, list=16%, signal=49% |
| KEGG_ACUTE_MYELOID_LEUKEMIA                                         | 57   | 0.55  | 1.69  | 0.025     | 0.047     | 0.477      | 6738        | tags=46%, list=12%, signal=52% |
| Gene sets enriched in phenotype low risk score group (186 samples)  |      |       |       |           |           |            |             |                                |
| KEGG_SPLICEOSOME                                                    | 127  | -0.7  | -2.02 | 0.008     | 0.042     | 0.054      | 9130        | tags=66%, list=16%, signal=79% |
| KEGG_HOMOLOGOUS_RECOMBINATION                                       | 28   | -0.75 | -1.96 | 0.008     | 0.046     | 0.095      | 8258        | tags=68%, list=15%, signal=79% |
| KEGG_OXIDATIVE_PHOSPHORYLATION                                      | 131  | -0.66 | -1.95 | 0.017     | 0.037     | 0.108      | 9250        | tags=64%, list=16%, signal=76% |
| KEGG_HUNTINGTONS_DISEASE                                            | 180  | -0.55 | -1.95 | 0.012     | 0.028     | 0.108      | 8488        | tags=47%, list=15%, signal=55% |
| KEGG_RNA_POLYMERASE                                                 | 28   | -0.7  | -1.94 | 0.006     | 0.025     | 0.117      | 9322        | tags=61%, list=16%, signal=73% |

|                                 |     |       |       |       |       |       |       |                                 |
|---------------------------------|-----|-------|-------|-------|-------|-------|-------|---------------------------------|
| KEGG_PYRIMIDINE_METABOLISM      | 97  | -0.59 | -1.92 | 0.012 | 0.026 | 0.133 | 9322  | tags=53%, list=16%, signal=63%  |
| KEGG_PARKINSONS_DISEASE         | 128 | -0.64 | -1.89 | 0.018 | 0.027 | 0.16  | 9688  | tags=62%, list=17%, signal=74%  |
| KEGG_BASE_EXCISION_REPAIR       | 35  | -0.7  | -1.89 | 0.004 | 0.024 | 0.16  | 13992 | tags=77%, list=25%, signal=102% |
| KEGG_NUCLEOTIDE_EXCISION_REPAIR | 44  | -0.66 | -1.86 | 0.018 | 0.03  | 0.199 | 9422  | tags=59%, list=17%, signal=71%  |
| KEGG_DNA_REPLICATION            | 36  | -0.76 | -1.81 | 0.014 | 0.041 | 0.262 | 7485  | tags=75%, list=13%, signal=86%  |
